# Supplementary material for: Increased ex vivo cell death of central memory CD4 T cells in treated HIV infected individuals with unsatisfactory immune recovery
Source: PubMed Central journal article supplement (PMC4504072; doi:10.1186/s12967-015-0601-2), 2015-07-17
Supplement: 12967_2015_601_MOESM1_ESM.pdf [file 12967_2015_601_MOESM1_ESM.pdf]

**A**

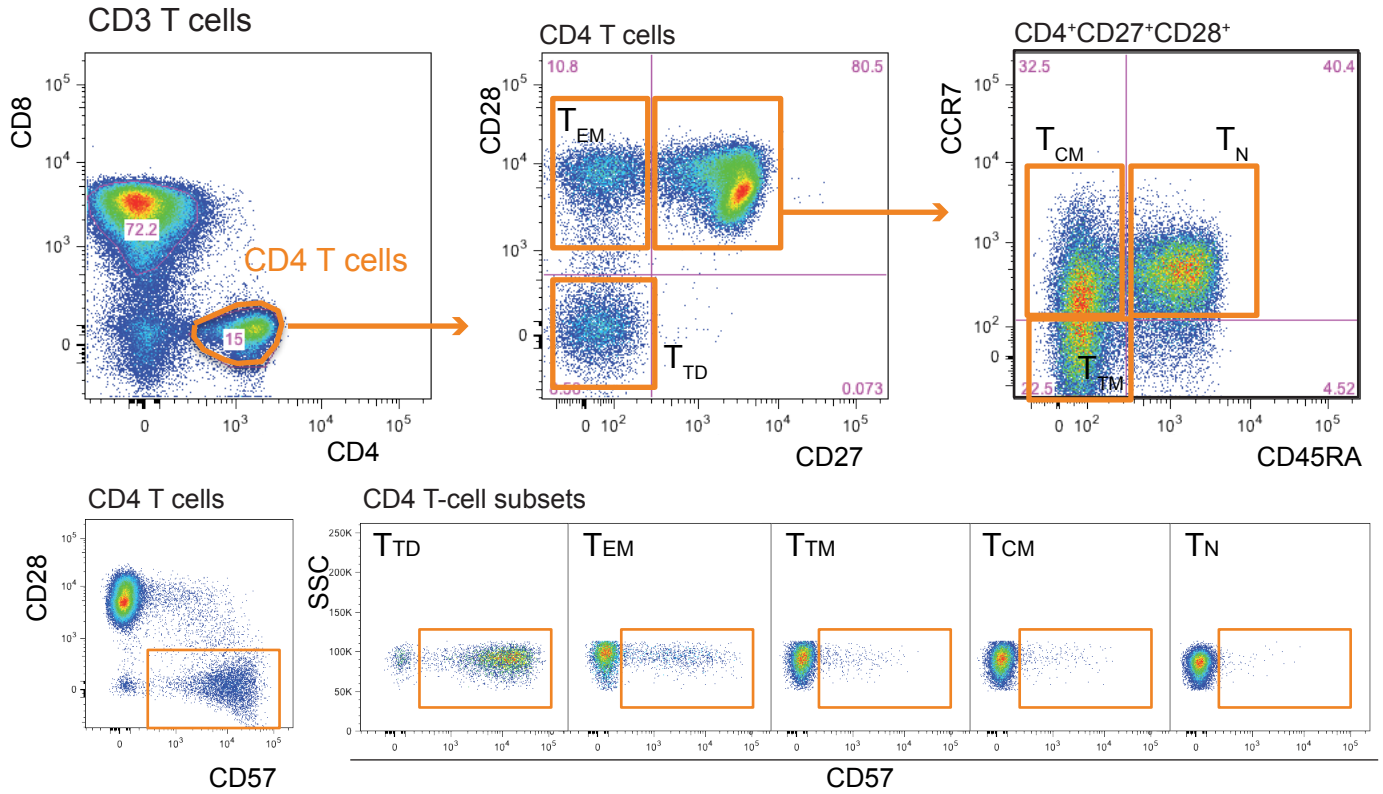

**B**

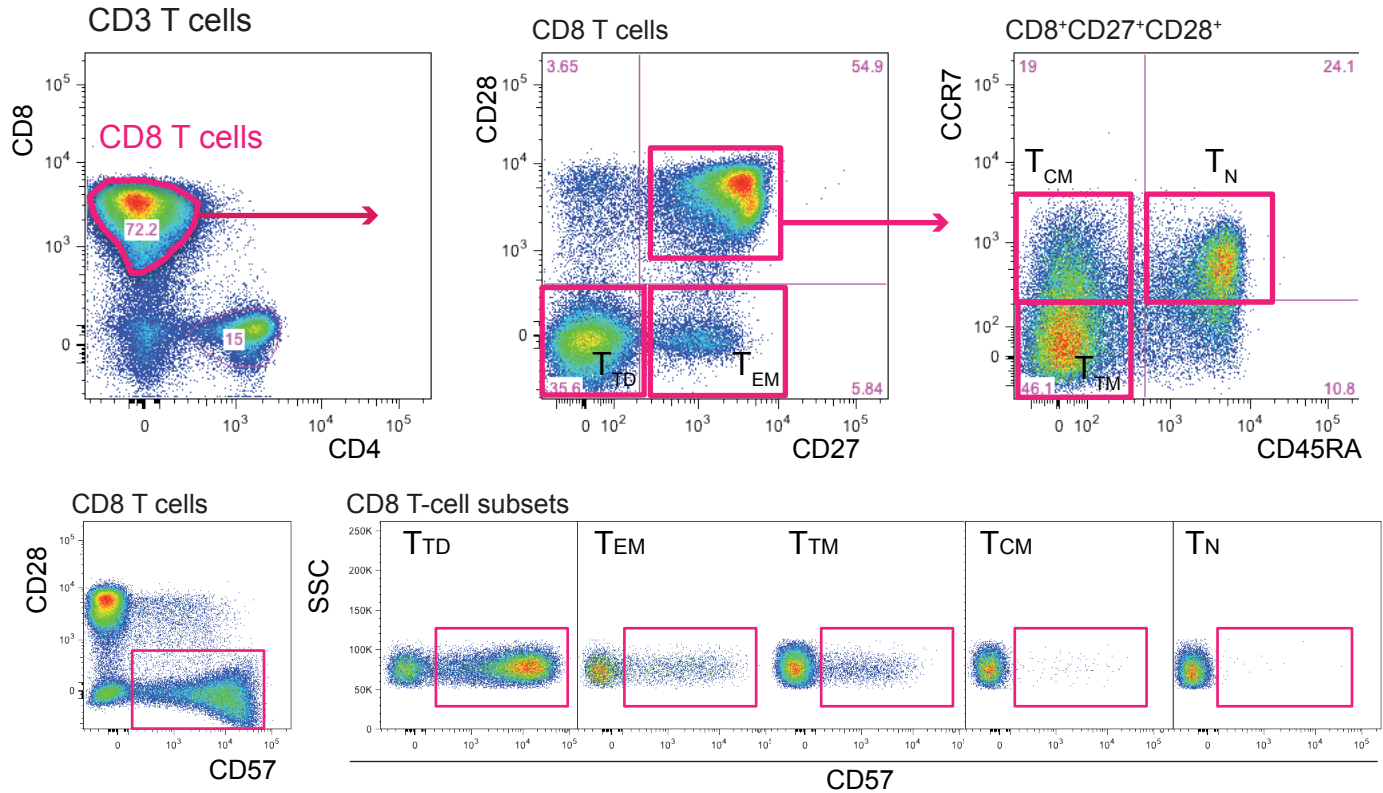

**Supplementary Figure 1.** Gating strategy followed to identify T-cell maturation stages. **Panel A.** CD4 and CD8 T cells were gated and analyzed for the expression of CD27 and CD28. For CD4 T cells, terminally differentiated ( $T_{TD}$ ) cells were defined as CD28<sup>-</sup>CD27<sup>-</sup>, while effector memory ( $T_{EM}$ ) cells were CD28<sup>+</sup>CD27<sup>-</sup>. Double positive cells were further analyzed for CCR7 and CD45RA expression to identify naïve ( $T_N$ ) cells (CCR7<sup>+</sup>CD45RA<sup>+</sup>), central memory ( $T_{CM}$ ) cells (CCR7<sup>+</sup>CD45RA<sup>-</sup>) and transitional Memory ( $T_{TM}$ ) cells (CCR7<sup>-</sup>CD45RA<sup>-</sup>). **Panel B.** For CD8 T cells, the general strategy was similar, unless for the definition of  $T_{EM}$  cells that was CD27<sup>+</sup>CD28<sup>-</sup> cells. The expression of CD57 was analyzed in the whole CD4 or CD8 T-cell population (lower left dot plot in each panel) to define replicative senescence (CD28<sup>-</sup>CD57<sup>+</sup> cells). In addition the expression of CD57 in each subset was also evaluated (lower dot plots in each panels).
