# Supplementary material for: Increased ex vivo cell death of central memory CD4 T cells in treated HIV infected individuals with unsatisfactory immune recovery
Source: PubMed Central journal article supplement (PMC4504072; doi:10.1186/s12967-015-0601-2), 2015-07-17
Supplement: 12967_2015_601_MOESM2_ESM.pdf [file 12967_2015_601_MOESM2_ESM.pdf]

## Supplementary Table 1

**Table S1.A.** The multivariate relationship between  $T_N$ ,  $T_{CM}$ ,  $T_{TM}$ ,  $T_{EM}$ ,  $T_{TD}$  and Total Death were determined by multiple linear regression

| Full Model <sup>a</sup> |          |            |         |            | Final Model <sup>b</sup> |          |            |         |            |
|-------------------------|----------|------------|---------|------------|--------------------------|----------|------------|---------|------------|
|                         | Estimate | Std. Error | t value | Pr( >  t ) |                          | Estimate | Std. Error | t value | Pr( >  t ) |
| (Intercept)             | 13.8103  | 4.5829     | 3.01    | 0.0043     | (Intercept)              | 13.2695  | 4.1680     | 3.18    | 0.0026     |
| Naive                   | 0.0009   | 0.0161     | 0.06    | 0.9534     | Transitionals            | 0.1791   | 0.0349     | 5.13    | 0.0000     |
| Central Memory          | 0.0290   | 0.0544     | 0.53    | 0.5962     |                          |          |            |         |            |
| Transitionals           | 0.1179   | 0.0817     | 1.44    | 0.1560     |                          |          |            |         |            |
| Effector                | 0.0116   | 0.0356     | 0.33    | 0.7467     |                          |          |            |         |            |
| Term diff               | 0.0142   | 0.0549     | 0.26    | 0.7976     |                          |          |            |         |            |

<sup>a</sup>Model with all predictor variables. <sup>b</sup>Final model (adj  $R^2=0.34$ ,  $P$ -value  $<0.001$ ) derived from Stepwise procedure using the akaike information criterion (AIC).

**Table S1.B.** Linear regression model shows no statistical differences between group of patients (Discordant/Concordant) in the association of Total Death with  $T_{TM}$ .

|                          | Estimate | Std. Error | t value | Pr( >  t ) |
|--------------------------|----------|------------|---------|------------|
| (Intercept)              | 13.1098  | 5.5317     | 2.37    | 0.0220     |
| Transitionals            | 0.1799   | 0.0399     | 4.51    | 0.0000     |
| Transitionals:Discordant | 0.0027   | 0.0603     | 0.04    | 0.9647     |
