# Supplementary material for: Increased ex vivo cell death of central memory CD4 T cells in treated HIV infected individuals with unsatisfactory immune recovery
Source: PubMed Central journal article supplement (PMC4504072; doi:10.1186/s12967-015-0601-2), 2015-07-17
Supplement: 12967_2015_601_MOESM3_ESM.pdf [file 12967_2015_601_MOESM3_ESM.pdf]

## Immunoconcordant

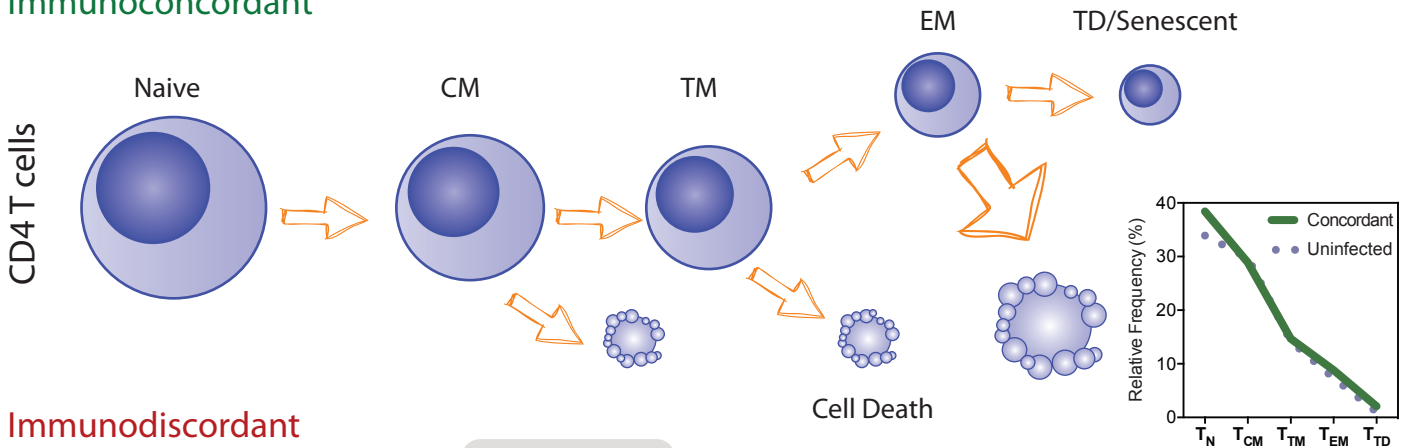

## Immunodiscordant

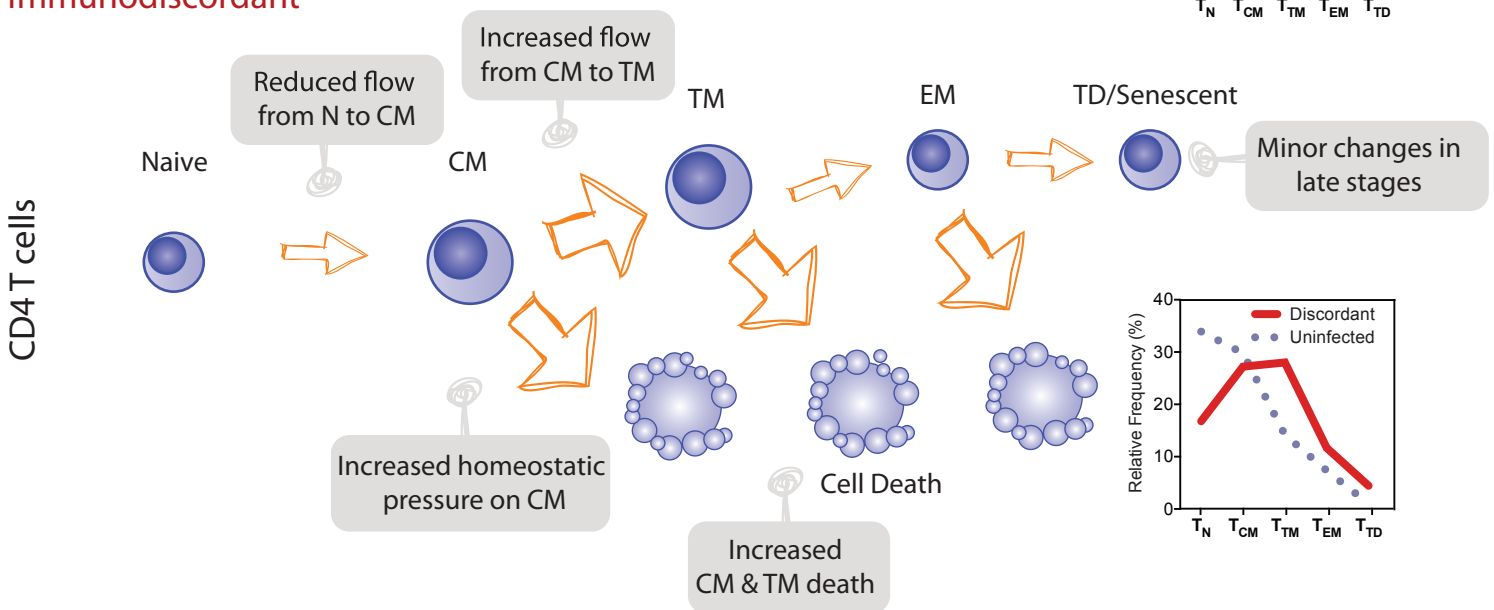

**Supplementary Figure 2.** A model for CD4 homeostasis in Immunodiscordant individuals. Immunoconcordant individuals show a full recovery of CD4 T-cell counts with a high representation of naïve cells, and balanced frequencies of different memory subsets (upper panels). The profile of CD4 T-cell maturation in immunoconcordant individuals (green line) overlaps with that of HIV uninfected individuals (blue line in upper right plot) in which CCR7<sup>-</sup> CD4 T cells show increased turnover and short live [22]. Conversely, immunodiscordant individuals (lower panels) show a reduced naïve subset with no signs of altered turnover [14] that limits the generation of new memory cells. Among memory subsets, central memory cells are also reduced and subjected to homeostatic pressure to generate new cells [14] increasing  $T_{CM} \rightarrow T_{TM}$  transition (and lowering  $T_{CM}/T_{TM}$  ratios) and increasing  $T_{CM}$  cell death.  $T_{TM}$  and  $T_{EM}$  cells emerging from  $T_{CM}$  cells also show higher sensitivity to cell death (Figure 2D), explaining the lack of accumulation of terminally differentiated cells in these subjects. This scenario results in a shifted profile of CD4 T-cell maturation (red line) compared to healthy individuals (blue line in lower right plot).
